# Supplementary material for: Host mechanisms involved in cattle Escherichia coli O157 shedding: a fundamental understanding for reducing foodborne pathogen in food animal production
Source: PubMed Central journal article supplement (PMC5550497; doi:10.1038/s41598-017-06737-4), 2017-08-09
Supplement: 41598_2017_6737_MOESM1_ESM.pdf [file 41598_2017_6737_MOESM1_ESM.pdf]

## Supplementary Figures

### **Host mechanisms involved in cattle *Escherichia coli* O157 shedding: a fundamental understanding for reducing foodborne pathogen in food animal production**

Ou Wang,<sup>1</sup> Tim A. McAllister,<sup>2</sup> Graham Plastow,<sup>1</sup> Kim Stanford,<sup>3</sup> Brent Selinger,<sup>4</sup> and Le Luo Guan<sup>1\*</sup>

<sup>1</sup>Department of Agricultural, Food and Nutritional Science, University of Alberta, Edmonton, AB, Canada, T6G 2P5; <sup>2</sup>Agriculture and Agri-Food Canada, Lethbridge Research Centre, Lethbridge, AB, Canada, T1J 4B1; <sup>3</sup>Alberta Agriculture and Forestry, Lethbridge, AB, Canada, T1J 4V6; and <sup>4</sup>Department of Biological Sciences, University of Lethbridge, Lethbridge, AB, Canada, T1K 3M4

\*Corresponding author.

Contact information: 410 Agriculture/Forestry Centre, University of Alberta, Edmonton, AB, Canada T6G2P5; Tel, 780-492-2480; Fax, 780-492-4265; E-mail. [lguan@ualberta.ca](mailto:lguan@ualberta.ca)

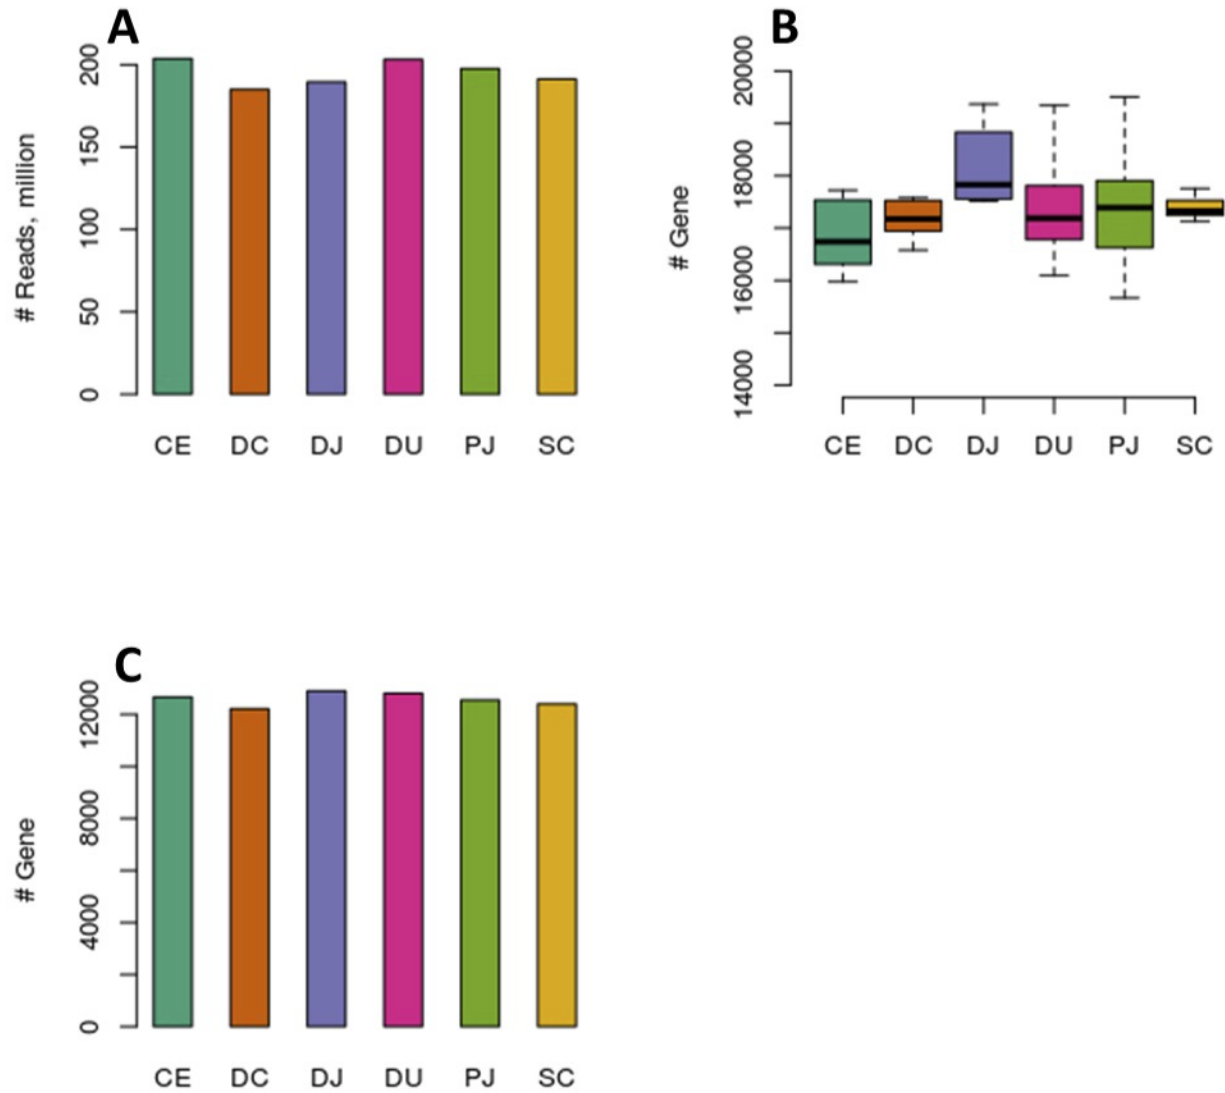

**Figure S1. RNA-Sequencing results:** (A) Number of reads generated for all tissue samples, ranged from 185 million to 203.7 million. (B) Number of genes detected in each sample, ranged from  $16,846 \pm 639$  (CE) to  $18,137 \pm 696$  (DJ). (C) Number of genes in core transcriptome of each gene, ranged from 12,216 (in DC) to 12,905 (in DJ). DU, duodenum; PJ, proximal jejunum; DJ, distal jejunum; CE, cecum; SC, spiral colon; DC, descending colon.

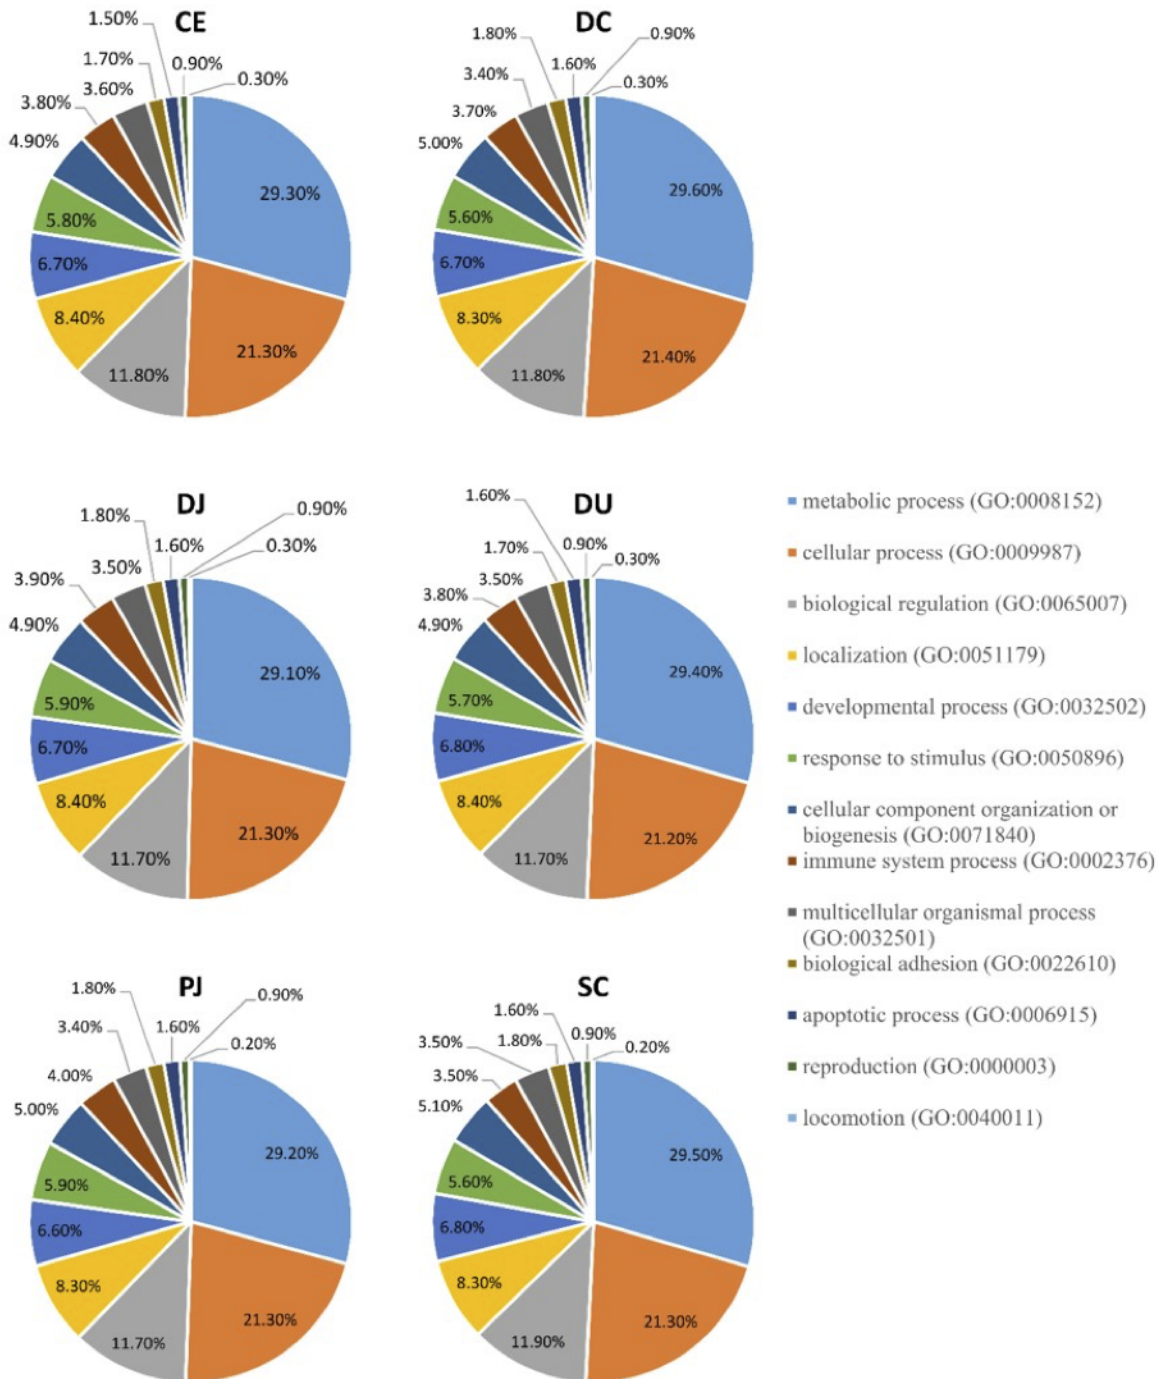

**Figure S2.** Top GO terms enriched for core transcriptome of each intestinal region. The pie charts indicated the percentage of “number of genes / number of GO term hits” scale. About 50% of genes are associated with two GO terms including “metabolic process”, “cellular process”. DU, duodenum; PJ, proximal jejunum; DJ, distal jejunum; CE, cecum; SC, spiral colon; DC, descending colon.

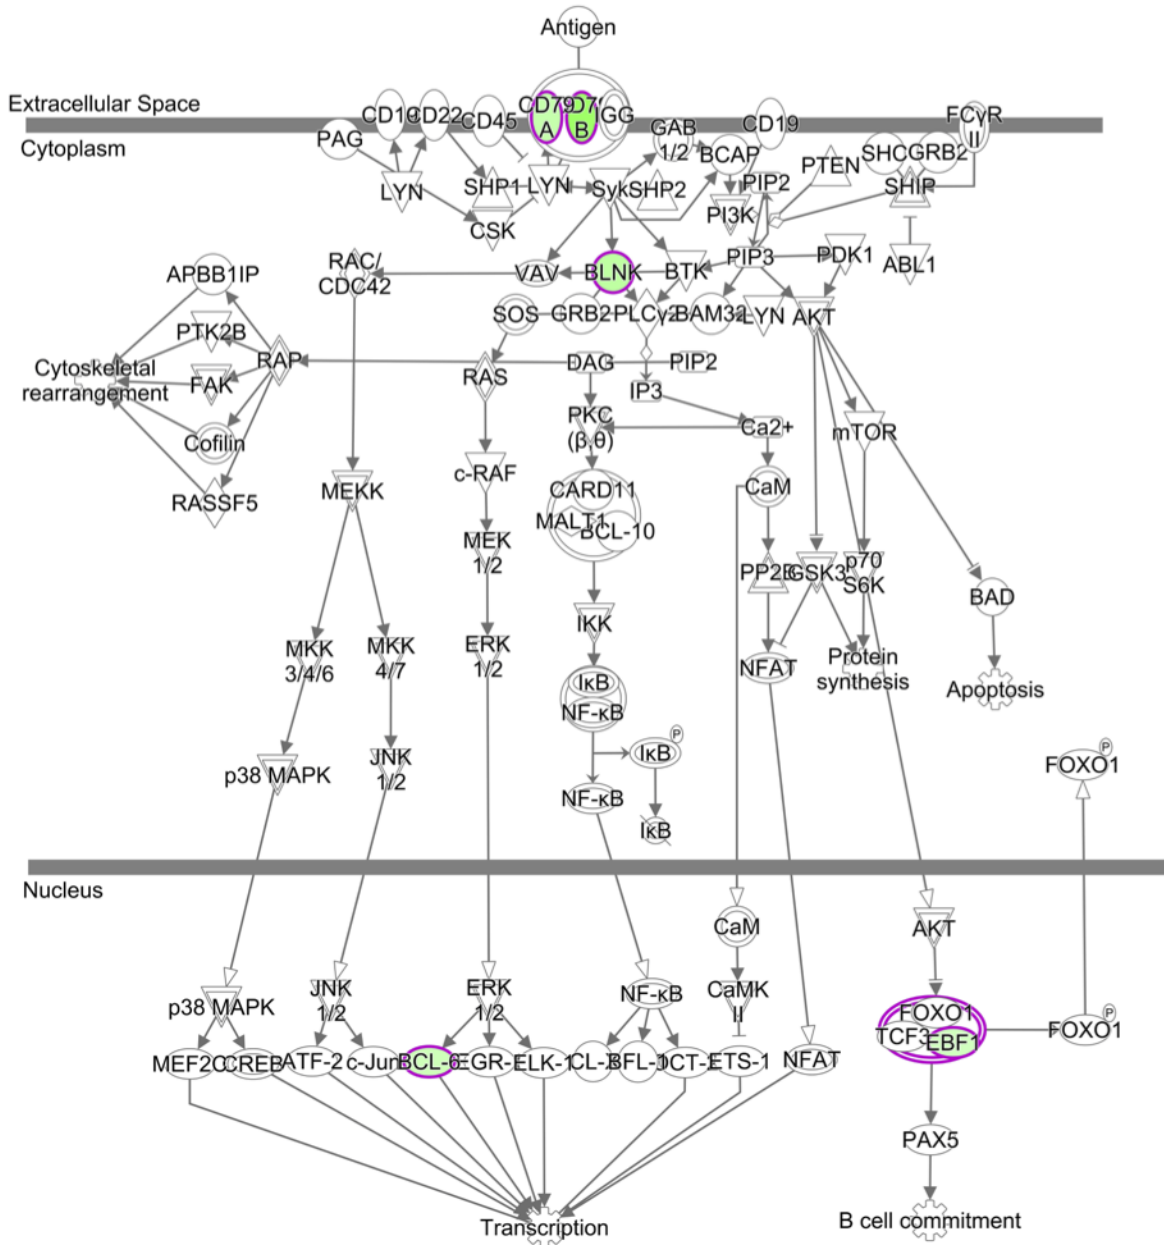

© 2000-2016 QIAGEN. All rights reserved.

**Figure S3. B-cell signalling pathway**, the green coloured genes were down-regulated in the distal jejunum of super-shedders. The figure was generated using Ingenuity Pathway Analysis (IPA, QIAGEN, Redwood City, CA, United States [www.qiagen.com/ingenuity](http://www.qiagen.com/ingenuity)). Permission was granted by QIAGEN Silicon Valley to use the copyrighted figure for publication. Figures produced from IPA are available under an open-access CC-BY license for purposes of publication.
